# Supplementary material
Source: PubMed Central journal article supplement (PMC8194363)
Supplement: NIHMS1704180-supplement-Supple_tables.pdf [file NIHMS1704180-supplement-Supple_tables.pdf]

**Table S1.** PubMed identifiers of the publications used in this study

| Training set            | NCBI (PMC) PubMed ID                                                                                                                                                                                                                                                                                                |
|-------------------------|---------------------------------------------------------------------------------------------------------------------------------------------------------------------------------------------------------------------------------------------------------------------------------------------------------------------|
| Relevant publications   | 1282569; 1375293; 7538590; 7689109; 8523406; 8558522; 8809165; 9240358; 9622549; 9685236; 9719591; 9748354; 10052969; 10579849; 10821714; 26345647; 11384233; 11472208; 11844664; 12642128; 16107158; 16162014; 16220981; 18506577; 23217210; 19058881; 19411176; 20728367; 21193314; 25522204; 28859311            |
| Irrelevant publications | 8667357; 11078020; 11170624; 11212098; 11229762; 11371163; 11575933; 14717471; 15183338; 15183348; 15634005; 15916427; 16279773; 16527484; 16782042; 16884295; 17081812; 17488516; 18155520; 18155520; 18313992; 19046616; 19386130; 19626612; 19665597; 20060625; 20449621; 21713384; 23416260; 25462235; 26045359 |

**Table S2.** Results of automatic categorizing publications into relevant and irrelevant

| Data sets                                                              | Based on abstracts |                |                | Based on full texts |                |                |
|------------------------------------------------------------------------|--------------------|----------------|----------------|---------------------|----------------|----------------|
|                                                                        | Sens               | Spec           | BA             | Sens                | Spec           | BA             |
| Data set 1<br>5-fold CV                                                | 0.79               | 0.87           | 0.83           | 0.77                | 0.87           | 0.81           |
| Data set 1<br>(training)/<br>Data set 2 (test)                         | 0.82               | 0.84           | 0.83           | 0.66                | 0.92           | 0.79           |
| Random<br>sampling with<br>replacement<br>(Data set 1 +<br>Data set 2) | 0.82<br>± 0.12*    | 0.80<br>± 0.11 | 0.81<br>± 0.06 | 0.79<br>± 0.11      | 0.84<br>± 0.09 | 0.82<br>± 0.05 |

\* The Mean ± (Standard Deviation) is given.

**Table S3.** Occurrence of MeSH terms and in the publications (a) manually divided into relevant and irrelevant and (b) classified to be relevant and irrelevant.

(a)

| <i>Data set 1 (manual classification)</i> |                              |                                |          |
|-------------------------------------------|------------------------------|--------------------------------|----------|
| Keyword                                   | A (Frequency in Relevant), % | B (Frequency in irrelevant), % | R (A/B)* |
| Human immunodeficiency virus              | 16                           | -                              | -        |
| Reverse transcriptase                     | 16                           | -                              | -        |
| (Q)SAR analysis                           | -                            | 3                              | -        |

| MeSH terms                       | A (Frequency in Relevant), % | B (Frequency in irrelevant), % | R (A/B)* |
|----------------------------------|------------------------------|--------------------------------|----------|
| HIV Reverse Transcriptase        | 77                           | 56                             | 1.38     |
| Reverse Transcriptase Inhibitors | 74                           | 70                             | 1.05     |
| HIV-1                            | 74                           | 36                             | 2.05     |
| Anti-HIV Agents                  | 51                           | 46                             | 1.1      |
| Humans                           | 54                           | 46                             | 1.17     |

(b)

| <i>PubMed data set (automatic classification relevant/irrelevant)</i> |                              |                                |          |
|-----------------------------------------------------------------------|------------------------------|--------------------------------|----------|
| Keyword                                                               | A (Frequency in Relevant), % | B (Frequency in irrelevant), % | R (A/B)* |
| HIV-1                                                                 | 8.99                         | 1.33                           | 6.75     |
| HIV                                                                   | 2.5                          | 3.5                            | 0.71     |
| Reverse transcriptase                                                 | 6                            | 0.75                           | 8        |
| NNRTI                                                                 | 2.6                          | 0.6                            | 4        |
| Anti-HIV activity                                                     | 1.3                          | 0.007                          | 185      |
| Anti-HIV-1 activity                                                   | 1.75                         | 0.0035                         | 500      |
| MeSH terms                                                            | A (Frequency in Relevant), % | B (Frequency in irrelevant), % | R (A/B)* |
| Reverse transcriptase inhibitors                                      | 50                           | 45                             | 1.1      |
| HIV-1                                                                 | 43.5                         | 51.5                           | 0.81     |
| Anti HIV Agents                                                       | 41                           | 50                             | 0.69     |
| HIV Reverse Transcriptase                                             | 41                           | 21                             | 1.95     |
| Drug Resistance, Viral                                                | 11                           | 20                             | 0.55     |

\* Ratio of occurrence of the term in the set of relevant publications to that in the set of irrelevant ones.

**Table S4.** Results of categorizing the FoTs into classes according to bioassay characteristics.

| Category   | $N_{tr}^{pos*}$ | $N_{tr}^{neg**}$ | $N_{test}^{pos***}$ | $N_{test}^{neg****}$ | Sens | Spec | BA   |
|------------|-----------------|------------------|---------------------|----------------------|------|------|------|
| Cell-based | 149             | 102              | 137                 | 111                  | 0.96 | 0.98 | 0.97 |
| RT-based   | 102             | 149              | 111                 | 137                  | 0.98 | 0.96 | 0.97 |
| I          | 63              | 188              | 64                  | 184                  | 0.71 | 0.96 | 0.84 |
| II         | 86              | 165              | 73                  | 175                  | 0.76 | 0.90 | 0.83 |
| III        | 65              | 186              | 61                  | 191                  | 0.63 | 0.96 | 0.79 |
| IV         | 24              | 227              | 21                  | 231                  | 0.59 | 0.96 | 0.78 |
| V          | 41              | 210              | 30                  | 221                  | 0.64 | 0.96 | 0.80 |

\*  $N_{tr}^{pos}$  is the number of positive samples (fragments belonging to the particular category) in the training set

\*\*  $N_{tr}^{neg}$  is the number of negative samples (fragments not belonging to the particular category) in the training set

\*\*\*  $N_{test}^{pos}$  is the number of positive samples in the test set

\*\*\*\*  $N_{test}^{neg}$  is the number of negative samples in the test set

**Table S5.** Results of categorizing the publications into classes according to bioassay characteristics without preliminary extracting of the FoTs with bioassay description.

| Category   | Based on abstracts |      |      | Based on full texts |      |      |
|------------|--------------------|------|------|---------------------|------|------|
|            | Sens               | Spec | BA   | Sens                | Spec | BA   |
| Cell-based | 0.37               | 0.48 | 0.43 | 0.62                | 0.41 | 0.52 |
| RT-based   | 0.48               | 0.37 | 0.43 | 0.41                | 0.62 | 0.52 |
| I          | 0.99               | 0.12 | 0.56 | 0.94                | 0.12 | 0.53 |
| II         | 0.98               | 0.05 | 0.51 | 0.95                | 0.07 | 0.51 |
| III        | 0.60               | 0.41 | 0.51 | 0.62                | 0.49 | 0.56 |
| IV         | 0.94               | 0.05 | 0.50 | 0.95                | 0.07 | 0.51 |
| V          | 0.99               | 0.05 | 0.52 | 0.94                | 0.06 | 0.47 |
